# Supplementary material
Source: ML conference proceedings conference paper supplement (https://openaccess.thecvf.com/content/ICCV2023/html/Yuan_Late_Stopping_Avoiding_ICCV_2023_paper.html)
Supplement: Supplementary file 3 [file Yuan_Late_Stopping_Avoiding_ICCV_2023_supplemental.zip]

Archive with 2 entries (2 files):
- Latestopping_Supplementary.pdf
- __MACOSX/._Latestopping_Supplementary.pdf
